# Supplementary material
Source: PubMed Central journal article supplement (PMC7270883)
Supplement: jama-324-460-s004.pdf [file jama-324-460-s004.pdf]

## Data Sharing Statement

Li. Effect of Convalescent Plasma Therapy on Time to Clinical Improvement in Patients With Severe and Life-threatening COVID-19. *JAMA*. Published June 01, 2020. 10.1001/jama.2020.10044

### Data

**Data available:** Yes

**Data types:** Deidentified participant data, Other (please specify)

**Additional Information:** baseline data before plasma transfusion, relevant clinical treatment measures, changes of clinical status during study period, results of laboratory testing and clinical outcomes within 28 days of enrollment.

**How to access data:** [liuzhong@ibt.pumc.edu.cn](mailto:liuzhong@ibt.pumc.edu.cn).

**When available:** With publication

### Supporting Documents

**Document types:** None

### Additional Information

**Who can access the data:** [liuzhong@ibt.pumc.edu.cn](mailto:liuzhong@ibt.pumc.edu.cn)

**Types of analyses:** NA

**Mechanisms of data availability:** NA

**Any additional restrictions:** NA
